# Supplementary material
Source: Springer Nature journal article supplement (https://www.springermedizin.de/resource/supplementary/13041_2012_191_MOESM2_ESM.pdf/25657706)

**A****Mechanical Allodynia (von Frey filament)**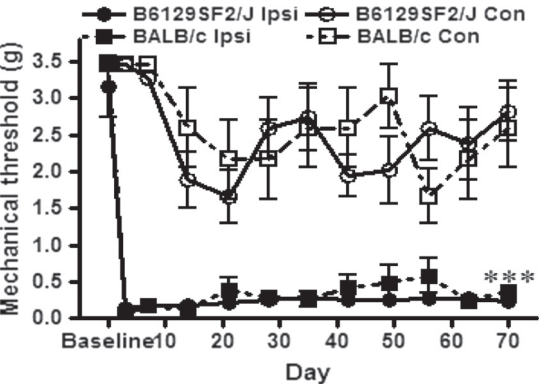**B****Cold Allodynia (Acetone)**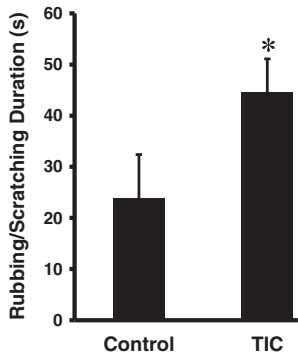

Supplement: MOESM2 [file 25657706]
